# Supplementary material
Source: MDPI journal article supplement (https://www.mdpi.com/2311-7524/7/11/495)
Supplement: s1 [file s1]

# Supplementary Materials: Mango Endophyte and Epiphyte Microbiome Composition during Fruit Development and Post-harvest Stages

Malick Bill, Lizyben Chidamba, Jarisma Keriuscia Gokul and Lise Korsten

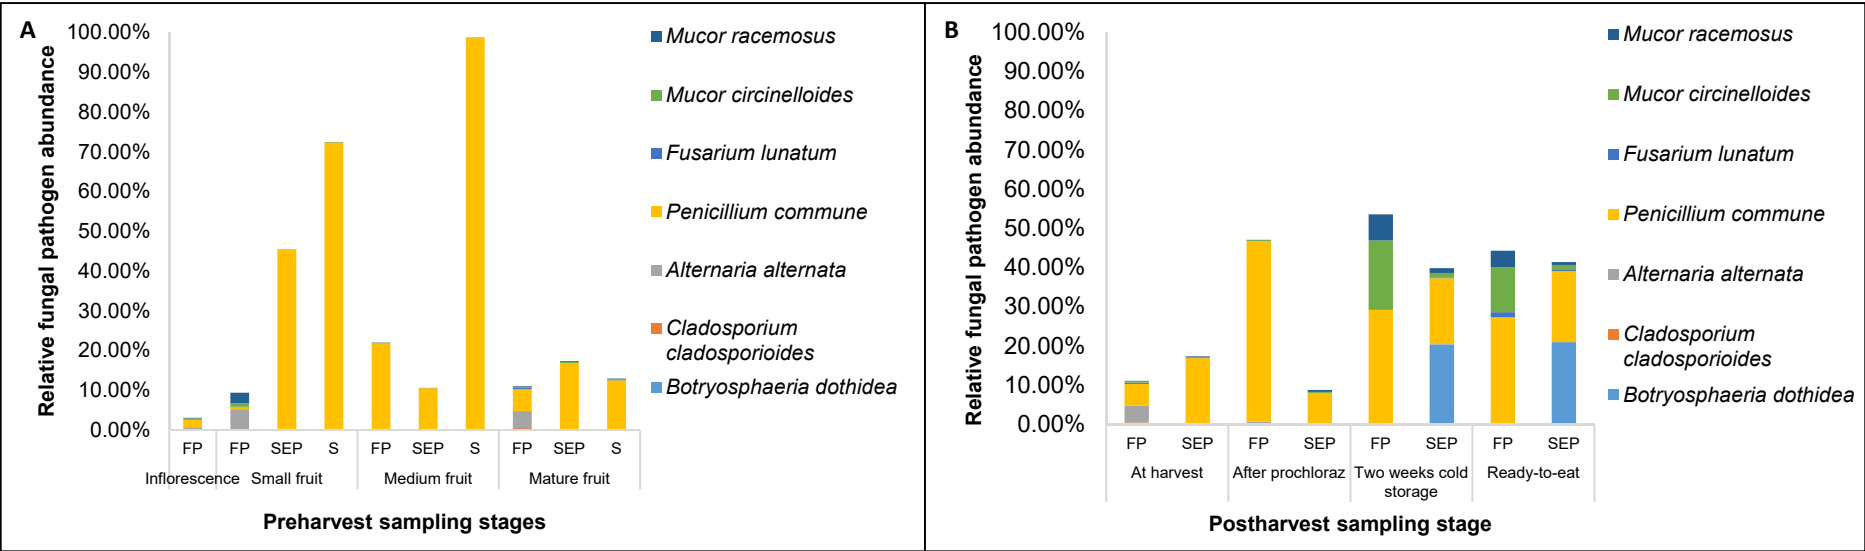

**Figure S1.** Taxonomic abundance of pathogenic fungal species at the preharvest (A) and postharvest stages (B) on the fructoplane, stem-end pulp and fruit stems of cv. Tommy Atkins mangoes. FP, fructoplane; SEP, stem-end pulp; S, fruit stem.
